# Supplementary material
Source: PubMed Central journal article supplement (PMC3024098)
Supplement: 11606_2010_1497_MOESM4_ESM.pdf [file 11606_2010_1497_MOESM4_ESM.pdf]

**Appendix 4. Definition of VA Outpatient Face-to-Face Visits (Technical specifications: clinic “stop” codes used to define face-to-face visits.)**

| <b>Code</b> | <b>Clinic Stop</b>                                                                 |
|-------------|------------------------------------------------------------------------------------|
| 501         | HOMELESS MENTALLY ILL                                                              |
| 504         | IPCC MEDICAL CENTER VI                                                             |
| 551         | IPCC COMMUNITY CLINIC                                                              |
| 565         | MH MEDICAL CARE ONLY-GRP                                                           |
| 566         | MH RISK-FACTOR-REDUCTION ED GRP                                                    |
| 568         | MENTAL HEALTH COMPENSATED WORK THERAPY/ SUPPORTED EMPLOYMENT (CWT/SE) Face-to-Face |
| 125         | SOCIAL WORK SVC                                                                    |
| 165         | BEREAVEMENT COUNSELING                                                             |
| 173         | HBPC-SOCIAL WORK                                                                   |
| 292         | OBSERV PSYCHIATRY                                                                  |
| 293         | OBSERVATION NEUROLOGY                                                              |
| 315         | NEUROLOGY                                                                          |
| 420         | PAIN CLINIC                                                                        |
| 503         | MEN HLTH RESID CARE                                                                |
| 516         | PTSD GROUP                                                                         |
| 519         | SUBST/PTSD TEAMS                                                                   |
| 524         | ACT DUTY SEX TRAUMA                                                                |
| 529         | HEALTH CARE FOR HOMELESS VETERANS (HCHV)/HMI                                       |
| 532         | PSYCHOSOCIAL REHABILITATION-INDIVIDUAL (IND)                                       |
| 550         | MENTAL HYG-GRP                                                                     |
| 552         | MENTAL HEALTH INTENSIVE CASE MANAGEMENT (MHICM)                                    |
| 553         | DAY TRMT-GRP                                                                       |
| 554         | DAY HOSPITAL-GRP                                                                   |
| 557         | PSYCHIATRY-GROUP                                                                   |
| 558         | PSYCHOLOGY-GROUP                                                                   |
| 559         | PSY/SOC REHAB-GRP                                                                  |
| 560         | SUBST ABUSE-GRP                                                                    |
| 561         | PCT PTSD-GRP                                                                       |
| 563         | MH PRIM CARE TEAM-GRP                                                              |
| 564         | MH TEAM CASE MGT                                                                   |

|     |                                                                                     |
|-----|-------------------------------------------------------------------------------------|
| 577 | PSYCHOGERIATRIC CLINIC, GRP                                                         |
| 578 | PSYCHOGERIATRIC DAY PROGRAM                                                         |
| 580 | PTSD DAY HOSP                                                                       |
| 581 | PTSD DAY TREAT                                                                      |
| 589 | NON-ACTIVE DUTY SEX TRAUMA                                                          |
| 725 | RESIDENTIAL REHABILITATION TREATMENT PROGRAMS (RRTP) OUTREACH SERVICES              |
| 726 | RESIDENTIAL REHABILITATION TREATMENT PROGRAMS (RRTP) AFTERCARE – COMMUNITY          |
| 727 | RESIDENTIAL REHABILITATION TREATMENT PROGRAMS (RRTP) AFTERCARE – VA                 |
| 728 | RESIDENTIAL REHABILITATION TREATMENT PROGRAMS (RRTP) ADMISSION SCREENING SERVICES   |
| 730 | RESIDENTIAL REHABILITATION TREATMENT PROGRAMS (RRTP) – GENERAL CARE (ECS) USE ONLY] |
| 480 | COMPREHENSIVE FUNDOSCOPY EXAM                                                       |
| 650 | CONTRACT NURSING HOME DAYS                                                          |
| 651 | STATE NURSING HOME DAYS                                                             |
| 652 | STATE RESIDENTIAL REHABILITATION TREATMENT PROGRAMS (RRTP) HOME DAYS                |
| 653 | STATE HOSPITAL CARE                                                                 |
| 654 | NON-VA RESIDENTIAL CARE DAYS                                                        |
| 655 | COMMUNITY NON-VA CARE                                                               |
| 656 | DOD NON-VA CARE (Primary Only)                                                      |
| 658 | STATE HOME ADULT DAY HEALTH CARE                                                    |
| 681 | VA-PAID HOME/COMMUNITY CARE PROVIDERS                                               |
| 712 | HEPATITIS C REGISTRY                                                                |
| 716 | POST SURG RTINE AFTRCARE 2ND                                                        |
| 573 | MH INCENTIVE THERAPY-GRP FACE-TO-FACE                                               |
| 574 | MH COMPENSATED WORK THERAPY/TRANSITIONAL WORK EXPERIENCE (CWT/TWE) FACE-TO-FACE     |
| 101 | EMERGENCY UNIT                                                                      |
| 102 | ADMIT/SCREENING                                                                     |
| 116 | RESPIRATORY THERAPY                                                                 |
| 117 | NURSING                                                                             |
| 118 | HOME TRTMT SVCS                                                                     |
| 119 | COMMUNITY NURSING HOME FOLLOW-UP                                                    |
| 121 | RESIDENTIAL CARE (NON-MENTAL HEALTH (MH))                                           |
| 122 | PUB HEALTH NURS                                                                     |
| 123 | NUTR/DIET - IND                                                                     |
| 124 | NUTR/DIET - GRP                                                                     |
| 144 | RADIONUCLIDE THERAPY                                                                |

|     |                                              |
|-----|----------------------------------------------|
| 149 | RADIATION THERAPY TREATMENT                  |
| 152 | ANGIOGRAM CATHETERIZATION                    |
| 153 | INTERVENTIONAL RADIOGRAPHY                   |
| 160 | CLINICAL PHARM                               |
| 172 | HBPC- PHYSICIAN EXTENDER (NP, CNS, PA)       |
| 174 | HBPC-THERAPIST                               |
| 175 | HBPC DIETICIAN                               |
| 176 | HBPC-CLIN PHARMACY                           |
| 177 | HBPC-OTHER                                   |
| 180 | DENTAL                                       |
| 185 | PHYSICIAN EXTENDER (NP)                      |
| 186 | PHYSICIAN EXTENDER (PA)                      |
| 187 | PHYSICIAN EXTENDER (CNS)                     |
| 190 | ADULT DAY HEALTH                             |
| 191 | COMMUNITY ADULT DAY HEALTH CARE FOLLOW-UP    |
| 197 | POLYTRAUMA INDIVIDUAL                        |
| 198 | POLYTRAUMA GROUP                             |
| 202 | REC THERAPY SERVICES                         |
| 203 | AUDIOLOGY                                    |
| 204 | SPEECH PATHOLOGY                             |
| 205 | PHYSICAL THERAPY                             |
| 206 | OCCUPATION THPY                              |
| 209 | VIST COORD.                                  |
| 211 | AMPUTATION FOLLOW-UP CLINIC                  |
| 214 | KINESIOTHERAPY                               |
| 215 | SCI HOME PROGRAM                             |
| 217 | BLIND REHAB OUTPATIENT SPECIALIST (BROS)     |
| 218 | COMPUTER ASSISTED TRAINING (CAT) BLIND REHAB |
| 220 | VISUAL IMPAIRMENT OUTPATIENT PROGRAM (VISOR) |
| 290 | OBSERVATION MEDICINE                         |
| 291 | OBSERVATION SURGERY                          |
| 294 | OBSERVATION BLIND REHAB                      |
| 295 | OBSERV SPINAL CORD                           |
| 296 | OBSERV REHABILITATION                        |
| 311 | PACEMAKER                                    |

|     |                                                                                    |
|-----|------------------------------------------------------------------------------------|
| 317 | ANTI-COAGULATION CLINIC                                                            |
| 321 | GI ENDOSCOPY                                                                       |
| 327 | MEDICAL (MED) PHYSICIAN (MD) PERFORM INVASIVE OPERATING ROOM (OR) PROCEDURE (PROC) |
| 328 | MEDICAL SURGICAL DAY UNIT (MSDU)                                                   |
| 329 | MEDICAL PROC UNIT                                                                  |
| 330 | CHEMOTHERAPY PROCEDURES UNIT MEDICINE                                              |
| 331 | PRE-BED M.D.- MED                                                                  |
| 332 | PRE-BED R.N.- MED                                                                  |
| 333 | CARDIAC CATH                                                                       |
| 334 | CARDIAC STRESS TEST/EXERCISE TOLERANCE TEST (ETT)                                  |
| 335 | PADRECC (PARKINSON'S DISEASE RECC)                                                 |
| 336 | MEDICAL PRE-PROCEDURE EVALUATION                                                   |
| 370 | LONG-TERM CARE (LTC) SCREENING/ASSESSMENT                                          |
| 372 | MOVE PROGRAM INDIVIDUAL                                                            |
| 373 | MOVE PROGRAM GROUP                                                                 |
| 408 | OPTOMETRY                                                                          |
| 411 | PODIATRY                                                                           |
| 416 | AMBULATORY SURGERY EVALUATION BY NON-MD                                            |
| 418 | AMPUTATION CLIN                                                                    |
| 422 | CAST CLINIC                                                                        |
| 429 | OUTPAT CARE IN O.R.                                                                |
| 430 | CYSTOSCOPY (CYSTO) ROOM UNIT FOR OUTPATIENT                                        |
| 431 | CHEMO UNIT-SURG                                                                    |
| 432 | PRE-BED CARE MD (SURGICAL SERVICE)                                                 |
| 433 | PRE-BED CARE RN (SURGERY)                                                          |
| 435 | SURGICAL PROC UNIT                                                                 |
| 436 | CHIROPRACTIC CARE IN MEDICAL CENTER                                                |
| 437 | VICTORS                                                                            |
| 439 | LOW VISION CARE                                                                    |
| 520 | LT ENHANCE INDIV LONG TERM CARE ENHANCEMENT                                        |
| 521 | LT ENHANCE GROUP                                                                   |
| 590 | COMMUNITY OUTREACH HOMELESS VETS BY STAFF OTHER THAN HCHV AND RRTP PROGRAMS        |
| 602 | CHRONIC ASSISTED HEMODIALYSIS TREATMENT HEMODIALYSIS TREATMENT                     |
| 603 | LIMITED SELF CARE HEMODIALYSIS TREATMENT                                           |
| 604 | HOME/SELF HEMODIALYSIS TRAINING TREATMENT                                          |

|     |                                                                                                |
|-----|------------------------------------------------------------------------------------------------|
| 606 | CHRONIC ASSISTED PERITONEAL DIALYSIS                                                           |
| 607 | LIMITED SELF CARE PERITONEAL DIALYSIS                                                          |
| 608 | HOME/SELF PERITONEAL DIALYSIS TRAINING                                                         |
| 610 | CONTRACT DIALYSIS                                                                              |
| 707 | SMOKING CESSATION                                                                              |
| 708 | NUTRITION                                                                                      |
| 709 | PHYS FIT/EXER CS                                                                               |
| 731 | PSYCHIATRIC REHABILITATION RESIDENTIAL TREATMENT PROGRAM (PRRTP) – GENERAL CARE (ECS USE ONLY) |
| 533 | MH INTERVENTION BIOMEDICAL CARE IND                                                            |
| 567 | MHICM GRP                                                                                      |
| 538 | PSYCHOLOGICAL TESTING                                                                          |
| 502 | MENTAL HEALTH-IND                                                                              |
| 505 | DAY TRMT-IND                                                                                   |
| 506 | DAY HOSPITAL-IND                                                                               |
| 509 | PSYCHIATRY-IND                                                                                 |
| 510 | PSYCHOLOGY (PSO)- INDIVIDUAL                                                                   |
| 512 | MENTAL HEALTH CONSULTATION                                                                     |
| 525 | WOMEN'S STRESS DISORDER TREATMENT TEAMS                                                        |
| 531 | MH PRIM CARE TEAM-IND                                                                          |
| 540 | PTSD Clinical Team (PCT) POST –TRAUMATIC STRESS IND                                            |
| 562 | PTSD-INDIVIDUAL                                                                                |
| 576 | PSYCHOGERIATRIC CLINIC, IND                                                                    |
| 713 | GAMBLING ADDICTION                                                                             |
| 348 | PRIMARY CARE GROUP                                                                             |
| 394 | MED SPECIALTY GROUP PRI ONLY                                                                   |
| 170 | HBPC PHYSICIAN HOME-BASED PRIMARY CARE                                                         |
| 171 | HBPC - NURSING (RN or LPN)                                                                     |
| 210 | SPINAL CORD INJURY                                                                             |
| 301 | GENERAL INT MED                                                                                |
| 318 | GERIATRIC CLINIC                                                                               |
| 319 | GERIATRIC EVALUATION AND MANAGEMENT (GEM) CLINIC                                               |
| 322 | WOMENS CLINIC                                                                                  |
| 323 | PRIM CARE/MED                                                                                  |
| 350 | GERIATRIC PRIM CARE                                                                            |

|     |                                                           |
|-----|-----------------------------------------------------------|
| 704 | PAP TEST                                                  |
| 188 | PHYSICIAN RESIDENT                                        |
| 305 | ENDO METAB (EXCEPT DIABETES)                              |
| 306 | DIABETES                                                  |
| 201 | PM & RS                                                   |
| 219 | TRAUMATIC BRAIN INJURY (TBI))                             |
| 302 | ALLERGY IMMUNOL                                           |
| 303 | CARDIOLOGY                                                |
| 304 | DERMATOLOGY                                               |
| 307 | GASTROENTEROLOGY                                          |
| 308 | HEMATOLOGY                                                |
| 309 | HYPERTENSION                                              |
| 310 | INFECTIOUS DIS                                            |
| 312 | PULMONARY/CHEST                                           |
| 313 | RENAL/NEPHROL (EXCEPT DIALYSIS)                           |
| 314 | RHEUM/ARTHRITIS                                           |
| 316 | ONCOLOGY/TUMOR                                            |
| 320 | ALZH/DEMEN/CLIN                                           |
| 351 | ADVANCED ILLNESS COORDINATED CARE (AICC)                  |
| 401 | GENERAL SURGERY                                           |
| 402 | CARDIAC SURGERY                                           |
| 403 | ENT                                                       |
| 404 | GYNECOLOGY                                                |
| 405 | HAND SURGERY                                              |
| 406 | NEUROSURGERY                                              |
| 407 | OPHTHALMOLOGY                                             |
| 409 | ORTHOPEDICS                                               |
| 410 | PLASTIC SURGERY                                           |
| 412 | PROCTOLOGY                                                |
| 413 | THORACIC SURGERY                                          |
| 414 | UROLOGY                                                   |
| 415 | VASCULAR SURGERY                                          |
| 419 | ANESTHESIA PRE-OPERATION (OP) and/or POST-OP CONSULTATION |
| 426 | WOMEN SURGERY                                             |
| 427 | PRIMARY CARE/ SURGERY                                     |

|     |                                            |
|-----|--------------------------------------------|
| 457 | TRANSPLANT                                 |
| 691 | PRE-EMPLOYMENT PHYSICAL MILITARY PERSONNEL |
| 513 | SUBST ABUSE-IND                            |
| 514 | SUBST ABUSE-HOME                           |
| 523 | OPIOID SUBSTITUTION                        |
| 547 | INTEN SUBS ABUSE TRT                       |
| 556 | ALCOHOL TREATMENT - GR                     |
