# Supplementary material
Source: PubMed Central journal article supplement (PMC3024098)
Supplement: 11606_2010_1497_MOESM5_ESM.pdf [file 11606_2010_1497_MOESM5_ESM.pdf]

**Appendix 5. Definition of Primary Care Clinic Stops. (Technical specifications: Clinic stop codes used to define primary care encounters.)**

| <b>Code</b> | <b>Clinic Stop</b>                               |
|-------------|--------------------------------------------------|
| 348         | PRIMARY CARE GROUP                               |
| 394         | MED SPECIALTY GROUP PRI ONLY                     |
| 170         | HBPC PHYSICIAN HOME-BASED PRIMARY CARE           |
| 171         | HBPC - NURSING (RN or LPN)                       |
| 210         | SPINAL CORD INJURY                               |
| 301         | GENERAL INT MED                                  |
| 318         | GERIATRIC CLINIC                                 |
| 319         | GERIATRIC EVALUATION AND MANAGEMENT (GEM) CLINIC |
| 322         | WOMENS CLINIC                                    |
| 323         | PRIM CARE/MED                                    |
| 350         | GERIATRIC PRIM CARE                              |
| 704         | PAP TEST                                         |
